# Supplementary material for: FeS nanosheets assembled with 1T-MoS2 nanoflowers on iron foam for efficient overall water splitting
Source: Royal Society of Chemistry journal article supplement (doi:10.1039/d3ce01315d), 2024-01-01
Supplement: d3ce01315d1.pdf [file d3ce01315d1.pdf]

**Supporting Information**

**FeS Nanosheets Assembled with 1T-MoS<sub>2</sub> Nanoflowers on  
Iron Foam for Efficient Overall Water Splitting**

Bo Feng<sup>a</sup>, Shuting Jin<sup>b</sup>, Jihui Lang<sup>b</sup>, Jian Wang<sup>a</sup>, Jie Hua<sup>a</sup>, Yunfei Sun<sup>a</sup>, Wei Zhang<sup>a</sup>,  
Jin Wang<sup>a</sup>, Jian Cao<sup>\*,b</sup>

<sup>a</sup>College of Information Technology, Jilin Normal University, Siping 136000, PR  
China

<sup>b</sup>College of Physics, Jilin Normal University, Changchun 130103, PR China

Corresponding author E-mail: caojian\_928@163.com

## 1. Experimental

**1.1 Materials:** All chemicals were used without further purification (analytical grade). Thioacetamide ( $\text{CH}_3\text{CSNH}_2$ ) and sodium molybdate dihydrate ( $\text{Na}_2\text{MoO}_4 \cdot 2\text{H}_2\text{O}$ , 99%) were purchased from Shanghai Aladdin Biochemical Technology Co.Ltd (Shanghai, China) and Sinopharm Chemical Reagent Co. Ltd (Shanghai, China).

**1.2 Treatment of the Fe foam:** A piece of IF (20 mm × 25 mm) was washed with 1 mol/L HCl, acetone, 75% alcohol, and deionized water for several times to clear the surface impurities, and dried at 60 °C for 6 h in vacuum.

**1.3 Materials Characterization:** X-ray diffraction (XRD) patterns were obtained on a MAC Science MXP-18 X-ray diffractometer utilizing a Cu target radiation source. Transmission electron micrographs (TEM), high-resolution transmission electron micrographs (HRTEM) images were acquired on JEM-2100 electron microscope with the accelerating voltage of 200 kV. The scanning electron microscope (SEM) images, the elemental mappings and energy dispersive X-ray spectroscopy (EDAX) images were obtained on JEOLJ SM-7800F at 10.0 kV. The surface chemistry and the binding energy of different electronic states of the samples were examined by XPS with a Thermo ESCALAB 250Xi.

**1.4 Electrochemical Characterization:** HER/OER electrochemical performance tests were performed with a CHI 760E electrochemical workstation (Chenhua Corp., Shanghai) in a standard three-electrode system at ambient temperature, of which the graphite rod was used as the counter electrode, the Hg/HgO electrode was worked as the reference electrode and the FMSx sample (cutting into pieces of 0.3×0.3 cm<sup>2</sup>) was acted as the working electrode. In the two-electrode cell system, the as-prepared FMS<sub>0.5</sub> was served as cathode and anode respectively for overall water splitting. For comparison, 1T-MoS<sub>2</sub> was dropped on IF for testing, which named as 1T-MoS<sub>2</sub>/IF. The electrolyte was 1.0 M KOH (pH = 13.6) for all the electrochemical tests. Before the electrochemical experiments, the electrolyte was previously degassed with N<sub>2</sub> for 30 min. All the potentials were converted to potentials versus the reversible hydrogen electrode (RHE) by using the following equation:

$$E_{RHE} = E_{SCE} + 0.098 + 0.059 \times PH$$

Linear sweep voltammetry (LSV) curves were tested at a scan rate of  $5 \text{ mV s}^{-1}$  to obtain the polarization curves, which were steady-state after several cycles. All measured polarization curves were iR-corrected. For comparison, commercial Pt/C or  $\text{RuO}_2$  were also prepared as working electrodes. In a typical process, 20 mg of the commercial Pt/C (20 wt%) (or  $\text{RuO}_2$ ) powder was dispersed in a mixture of 60  $\mu\text{l}$  of nafion solution (1wt %) and 540  $\mu\text{l}$  of isopropanol solution, which was sonicated for 30 minutes. Then 8  $\mu\text{l}$  of the above solution was dropped on a piece of cleaned IF foam ( $0.3 \text{ cm} \times 0.3 \text{ cm}$ , catalysts loading  $\approx 3 \text{ mg cm}^{-2}$ ). The cycle durability was measured by the chronoamperometric response. Electrochemical impedance spectroscopy (EIS) measurements were carried out at frequency ranging from 0.1 to  $10^4 \text{ Hz}$ .

## 2. Supplementary Results

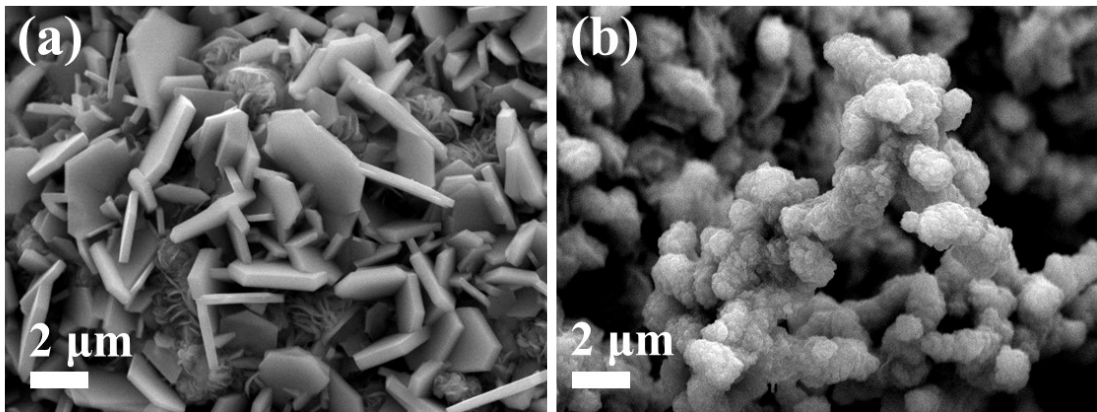

Fig. S1 SEM images of FMS 0.1(a) and FMS 0.9(b)

Table S1. Comparison of HER performance of FMS 0.5 with reported electrocatalysts

| Electrolyte | Catalyst                                                                         | Overpotential<br>(mV) | Current density<br>(mA/cm <sup>2</sup> ) | Tafel slope<br>(mV/dec <sup>2</sup> ) | ref       |
|-------------|----------------------------------------------------------------------------------|-----------------------|------------------------------------------|---------------------------------------|-----------|
| 1 M KOH     | FeS/Ni <sub>3</sub> S <sub>2</sub> @NF                                           | 130                   | 10                                       | 124                                   | [1]       |
| 1 M KOH     | CoS <sub>2</sub> /FeS-MOF@NF-1                                                   | 137                   | 10                                       | 80                                    | [2]       |
| 1 M KOH     | MoS <sub>2</sub> @Fe/Ni-MOF <sub>600-3</sub>                                     | 140                   | 10                                       | 158                                   | [3]       |
| 1 M KOH     | Ni-1T MoS <sub>2</sub>                                                           | 199                   | 10                                       | 52.7                                  | [4]       |
| 1 M KOH     | TEA-1T MoS <sub>2</sub>                                                          | 355                   | 10                                       | 70                                    | [5]       |
| 1 M KOH     | CT <sub>0.5</sub> -G1                                                            | 312                   | 10                                       | 85                                    | [6]       |
| 1 M KOH     | 1T/2H MoS <sub>2</sub> (25D)<br>/Ti <sub>3</sub> C <sub>2</sub> T <sub>x-1</sub> | 300                   | 10                                       | 117.2                                 | [7]       |
| 1 M KOH     | 1T MoS <sub>2</sub> /GO                                                          | 209                   | 10                                       | 71.7                                  | [8]       |
| 1 M KOH     | rGO/1T-MoS <sub>2</sub> /CeO <sub>2</sub>                                        | 140                   | 10                                       | 43                                    | [9]       |
| 1 M KOH     | FMS 0.5                                                                          | 245                   | 100                                      | 80.6                                  | This work |

Table S2. Comparison of OER performance of FMS 0.5 with reported electrocatalysts

| Electrolyte | Catalyst                                                                          | Overpotential<br>(mV) | Current density<br>(mA/cm <sup>2</sup> ) | Tafel slope<br>(mV/dec <sup>2</sup> ) | ref          |
|-------------|-----------------------------------------------------------------------------------|-----------------------|------------------------------------------|---------------------------------------|--------------|
| 1 M KOH     | FeS/Ni <sub>3</sub> S <sub>2</sub> @NF                                            | 192                   | 10                                       | 70                                    | [1]          |
| 1 M KOH     | CoS <sub>2</sub> /FeS-MOF@NF-<br>1                                                | 244                   | 50                                       | 27                                    | [2]          |
| 1 M KOH     | MoS <sub>2</sub> @Fe/Ni-MOF <sub>600-3</sub>                                      | 340                   | 10                                       | 158                                   | [3]          |
| 1 M KOH     | Ni-1T MoS <sub>2</sub>                                                            | 310                   | 10                                       | 103.2                                 | [4]          |
| 1 M KOH     | FeS/Fe <sub>3</sub> C@N-S-C-800                                                   | 570                   | 10                                       | 81                                    | [10]         |
| 1 M KOH     | 1T-Ni <sub>0.2</sub> Mo <sub>0.8</sub> S <sub>1.8</sub> P <sub>0.2</sub><br>NS/CC | 305                   | 40                                       | 76.5                                  | [11]         |
| 1 M KOH     | 0.2-A@NF                                                                          | 190                   | 10                                       | 166                                   | [12]         |
| 1 M KOH     | NiFe LDH/MoS <sub>2</sub>                                                         | 190                   | 10                                       | 31                                    | [13]         |
| 1 M KOH     | NiFe <sub>2</sub> O <sub>4</sub> /MoS <sub>2</sub>                                | 280                   | 10                                       | 48.7                                  | [14]         |
| 1 M KOH     | MoS <sub>2</sub> /NiS <sub>2</sub> /CC-2                                          | 384                   | 100                                      | 58                                    | [15]         |
| 1 M KOH     | FMS 0.5                                                                           | 316                   | 100                                      | 88.3                                  | This<br>work |

Table S3. The charge transfer resistance of IF, FeS, 1T-MoS<sub>2</sub>/IF and FMSx

| <b>Samples</b>          | <b>IF</b> | <b>FeS</b> | <b>1T MoS<sub>2</sub>/IF</b> | <b>FMS0.1</b> | <b>FMS0.5</b> | <b>FMS0.9</b> |
|-------------------------|-----------|------------|------------------------------|---------------|---------------|---------------|
| R <sub>ct</sub> (Ω) HER | 1.92      | 1.1        | 1.43                         | 0.9           | 0.72          | 0.93          |
| R <sub>ct</sub> (Ω) OER | 1.15      | 1          | 0.98                         | 0.7           | 0.65          | 0.71          |

## References

- [1] H. Li, S. Yang, W. Wei, M. Zhang, Z. Jiang, Z. Yan, J. Xie, Chrysanthemum-like FeS/Ni<sub>3</sub>S<sub>2</sub> heterostructure nanoarray as a robust bifunctional electrocatalyst for overall water splitting, *Journal of Colloid and Interface Science*, 2022, 608, 536-548.
- [2] Y. Yang, Q. Zhou, J. Yang, D. Qian, Y. Xiong, Z. Li, Z. Hu, Metal-organic framework derived CoS<sub>2</sub>/FeS-MOF with abundant heterogeneous interface as bifunctional electrocatalyst for electrolysis of water, *International Journal of Hydrogen Energy*, 2022, 47, 33728-33740.
- [3] Z. Lin, T. Feng, X. Ma, G. Liu, Fe/Ni bi-metallic organic framework supported 1T/2H MoS<sub>2</sub> heterostructures as efficient bifunctional electrocatalysts for hydrogen and oxygen evolution, *Fuel*, 2023, 339, 127395.
- [4] G. Wang, G. Zhang, X. Ke, X. Chen, X. Chen, Y. Wang, G. Huang, J. Dong, S. Chu, M. Sui, Direct synthesis of stable 1T-MoS<sub>2</sub> doped with Ni single atoms for water splitting in alkaline media, *Small*, 2022, 18, 2107238.
- [5] A. S. Goloveshkin, N. D. Lenenko, M. I. Buzin, V. I. Zaikovskii, A. V. Naumkin, A. S. Golub, Organic interlayers boost the activity of MoS<sub>2</sub> toward hydrogen evolution by maintaining high 1T/2H phase ratio, *International Journal of Hydrogen Energy*, 2023, 48, 10555-10565.
- [6] Y. Zhao, X. Zhang, T. Wang, T. Song, P. Yang, Fabrication of rGO/CdS@2H, 1T, amorphous MoS<sub>2</sub> heterostructure for enhanced photocatalytic and electrocatalytic activity, *International Journal of Hydrogen Energy*, 2020, 45, 21409-21421.
- [7] J. Y. Loh, F. M. Yap, W. J. Ong, 2D/2D heterojunction interface: Engineering of 1T/2H MoS<sub>2</sub> coupled with Ti<sub>3</sub>C<sub>2</sub>T<sub>x</sub> heterostructured electrocatalysts for pH-universal hydrogen evolution, *Journal of Materials Science & Technology*, 2024, 179, 86-97.
- [8] Y. Lv, H. Pan, J. Lin, Z. Chen, Y. Li, H. Li, M. Shi, R. Yin, S. Zhu, One-pot hydrothermal approach towards 2D/2D heterostructure based on 1T MoS<sub>2</sub> chemically bonding with GO for extremely high electrocatalytic performance, *Chemical Engineering Journal*, 2022, 428, 132072.
- [9] K. Nie, X. Qu, D. Gao, B. Li, Y. Yuan, Q. Liu, X. Li, S. Chong, Z. Liu, Engineering phase stability of semimetallic MoS<sub>2</sub> monolayers for sustainable



electrocatalytic hydrogen production, *ACS Applied Materials & Interfaces*, 2022, 14, 19847-19856.

[10] F. Kong, X. Fan, A. Kong, Z. Zhou, X. Zhang, Y. Shan, Covalent phenanthroline framework derived FeS@Fe<sub>3</sub>C composite nanoparticles embedding in N-S-Codoped carbons as highly efficient trifunctional electrocatalysts, *Advanced Functional Materials*, 2018, 28, 1803973.

[11] U. N. Pan, T. I. Singh, D. R. Paudel, C. C. Gudal, N. H. Kim, J. H. Lee, Covalent doping of Ni and P on 1T-enriched MoS<sub>2</sub> bifunctional 2D-nanostructures with active basal planes and expanded interlayers boosts electrocatalytic water splitting, *Journal of Materials Chemistry A*, 2020, 8, 19654-19664.

[12] Y. Zhao, S. Wei, F. Wang, L. Xu, Y. Liu, J. Lin, K. Pan, H. Pang, Hatted 1T/2H-phase MoS<sub>2</sub> on Ni<sub>3</sub>S<sub>2</sub> nanorods for efficient overall water splitting in alkaline media, *Chemistry—A European Journal*, 2020, 26, 2034-2040.

[13] S. Chakraborty, S. Marappa, S. Agarwal, D. Bagchi, A. Rao, C.P. Vinod, S.C. Peter, A. Singh, M. Eswaramoorthy, Improvement in oxygen evolution performance of NiFe layered double hydroxide grown in the presence of 1T-rich MoS<sub>2</sub>, *ACS Applied Materials & Interfaces*, 2022, 14, 31951-31961.

[14] M. M. Sebastian, P. Velayudham, A. Schechter, N. Kalarikkal, Spinel nickel ferrite nanoparticles supported on a 1T/2H mixed-phase MoS<sub>2</sub> heterostructured composite as a bifunctional electrocatalyst for oxygen evolution and oxygen reduction reactions, *Energy & Fuels*, 2022, 36, 7782-7794.

[15] J. Xu, J. Rong, Y. Zheng, Y. Zhu, K. Mao, Z. Jing, T. Zhang, D. Yang, F. Qiu, Construction of sheet-on-sheet hierarchical MoS<sub>2</sub>/NiS<sub>2</sub> heterostructures as efficient bifunctional electrocatalysts for overall water splitting, *Electrochimica Acta*, 2021, 385, 138438.
